# Supplementary material for: Flow cytometric printing of double emulsions into open droplet arrays
Source: Royal Society of Chemistry journal article supplement (doi:10.1039/d3lc00151b), 2023-01-01
Supplement: d3lc00151b4.pdf [file d3lc00151b4.pdf]

## Supporting Information

### Flow cytometric printing of double emulsions into open droplet arrays

**Authors:** Pengfei Zhang <sup>a,b</sup>, Linfeng Xu <sup>b</sup>, Huawei Chen <sup>a</sup>, and Adam R Abate <sup>b,c,\*</sup>

**Affiliations:**

<sup>a</sup> School of Mechanical Engineering and Automation, Beihang University, Beijing, China

<sup>b</sup> Department of Bioengineering and Therapeutic Sciences, University of California, San Francisco, San Francisco, CA, USA

<sup>c</sup> California Institute for Quantitative Biosciences, University of California, San Francisco, San Francisco, CA, USA

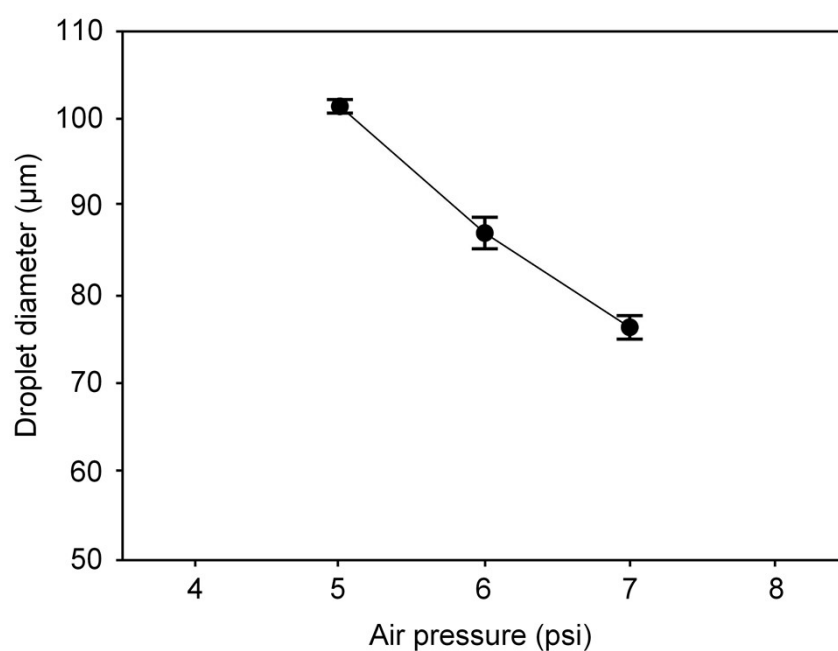

**Figure S1 Plot of droplet diameter as a function of air pressure.** Air pressure is varied from 5 psi to 7 psi, resulting in a decrease of droplet diameter from  $\sim 102 \mu\text{m}$  to  $\sim 76 \mu\text{m}$ .

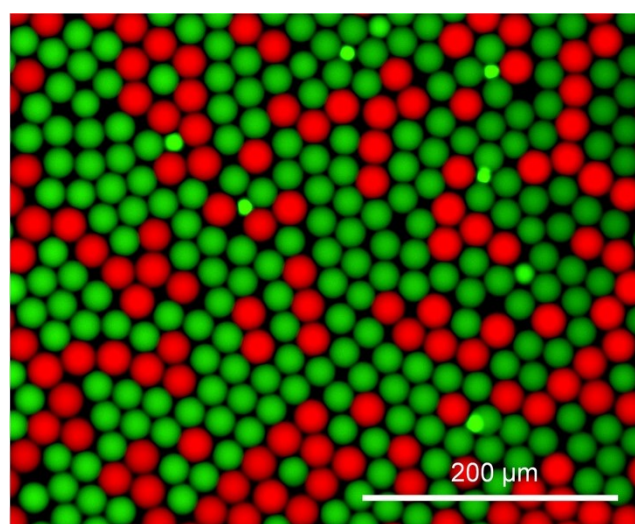

Reinjected single emulsion droplets

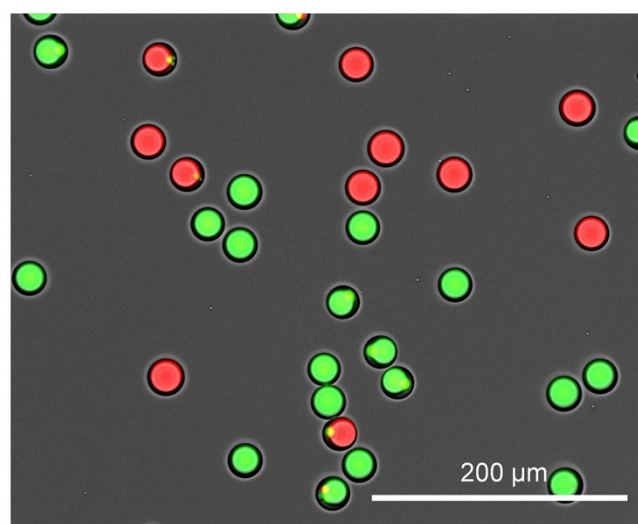

Printed double emulsion droplets into PBS

**Figure S2 Double emulsion droplets printing with two types of inner cores.** Optical image of reinjected single emulsions with two types of droplets (left, red droplets stained with TRITC and green droplets stained with FITC). Optical image of printed double emulsion droplets into PBS showing a mixture of two types of double emulsion droplets (right).
